# Supplementary material
Source: PubMed Central journal article supplement (PMC5568774)
Supplement: NIHMS874007-supplement-1.pdf [file NIHMS874007-supplement-1.pdf]

Supplementary Figure 1

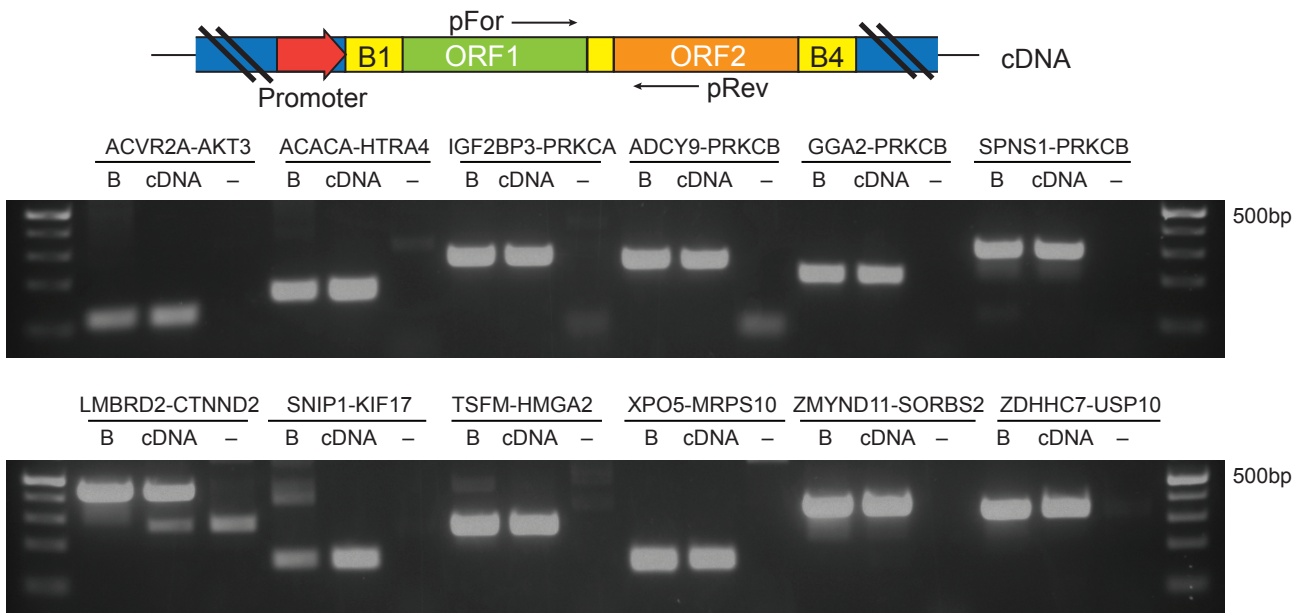

**Supplementary Figure 1.** PCR detection of the indicated fusion transcripts from Ba/F3 RNA/cDNA extracts. B = fusion DNA backbone (positive control); - = cDNA from GFP-expressing cells as negative control.

## Supplementary Figure 2

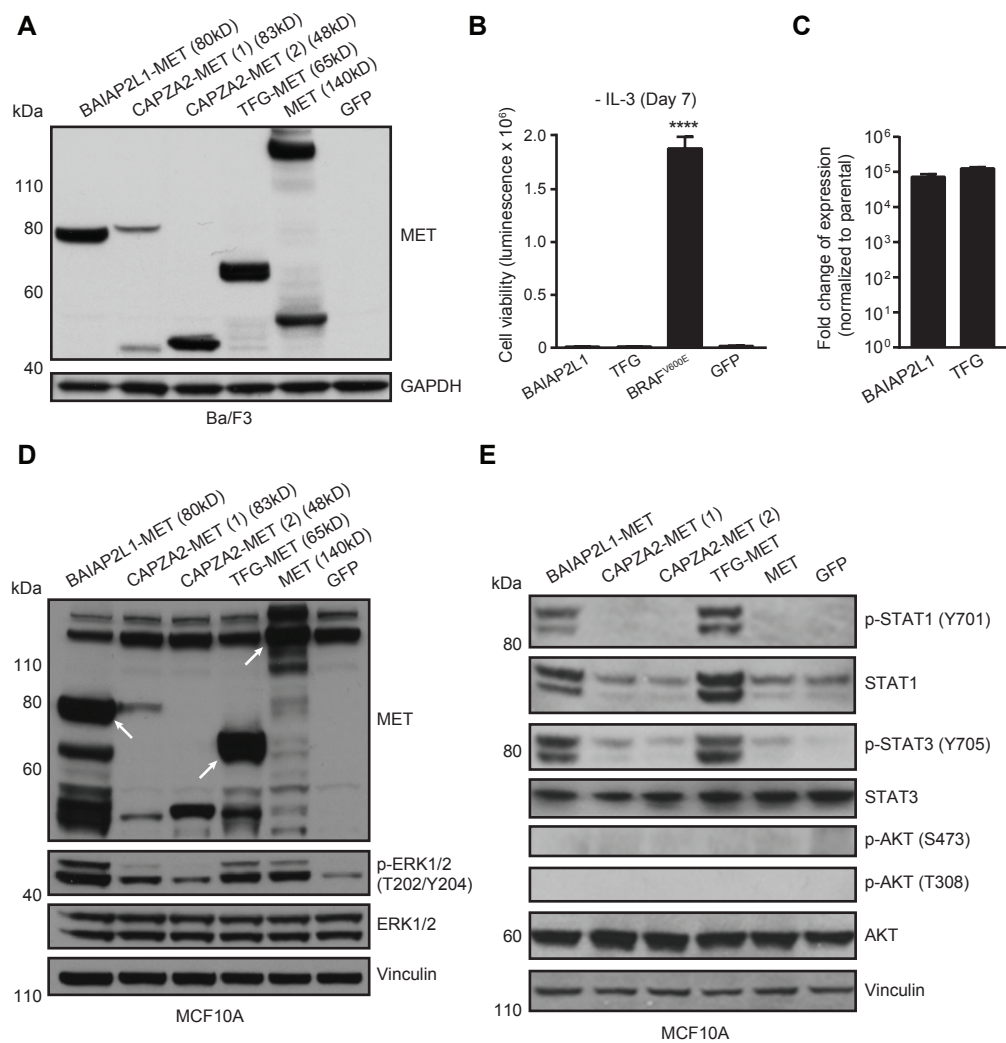

**Supplementary Figure 2. (A)** Immunoblots of *MET* fusions expression in Ba/F3. **(B)** Ba/F3 cell survival assay for full-length *BAIAP2L1* and *TFG* (mean luminescence, error bars denote standard deviation, N=3 respectively) compared to *BRAF<sup>V600E</sup>* (positive control). GFP = negative control. **(C)** Quantitative PCR of over-expression of *BAIAP2L1* and *TFG* in Ba/F3. **(D-E)** Immunoblots of *MET* fusions expression and MAPK and STAT signaling activation in MCF-10A cells. Arrow denotes the correct size of *BAIAP2L1-MET*, *TFG-MET*, and wild-type *MET*.

Supplementary Figure 3

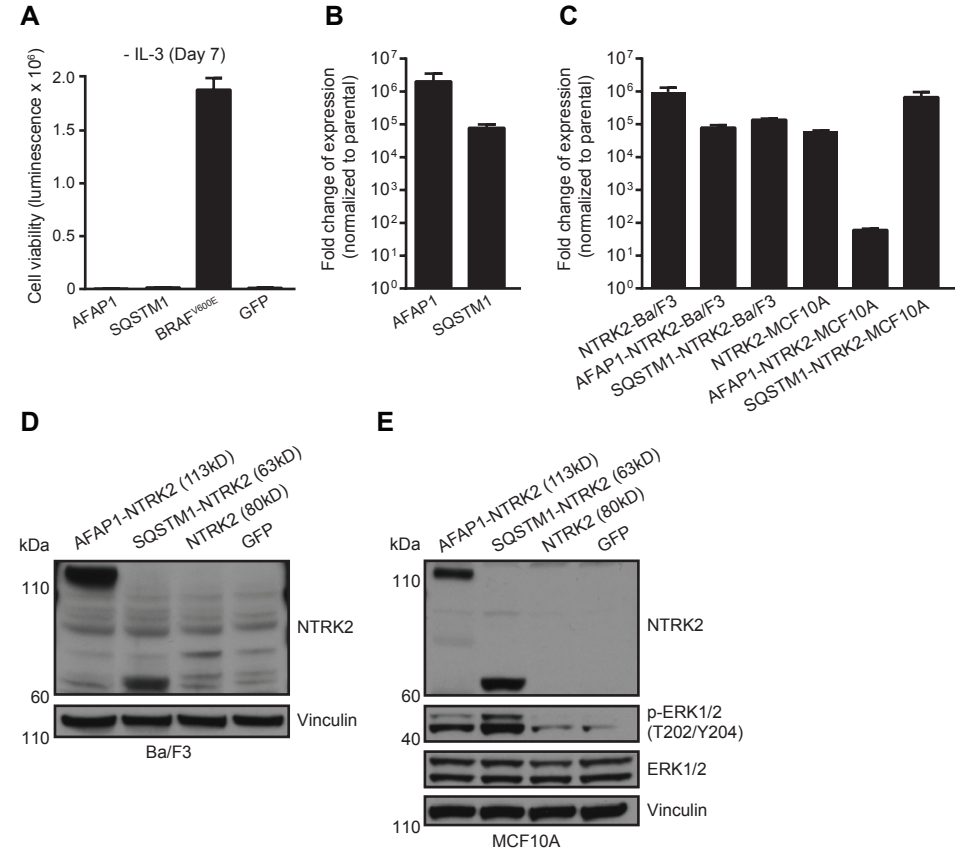

**Supplementary Figure 3.** (A) Ba/F3 cell survival assay for full-length *AFAP1* and *SQSTM1* (mean luminescence, error bars denote standard deviation, N=3, respectively) compared to *BRAF<sup>V600E</sup>* (positive control). GFP = negative control. Quantitative PCR of over-expression of (B) *AFAP1* and *SQSTM1* in Ba/F3 and (C) both *NTRK2* fusions and wild-type *NTRK2* in Ba/F3 and MCF-10A cells. (D-E) Immunoblots of *NTRK2* fusions expression and MAPK signaling activation in Ba/F3 and MCF-10A cells.

Supplementary Figure 4

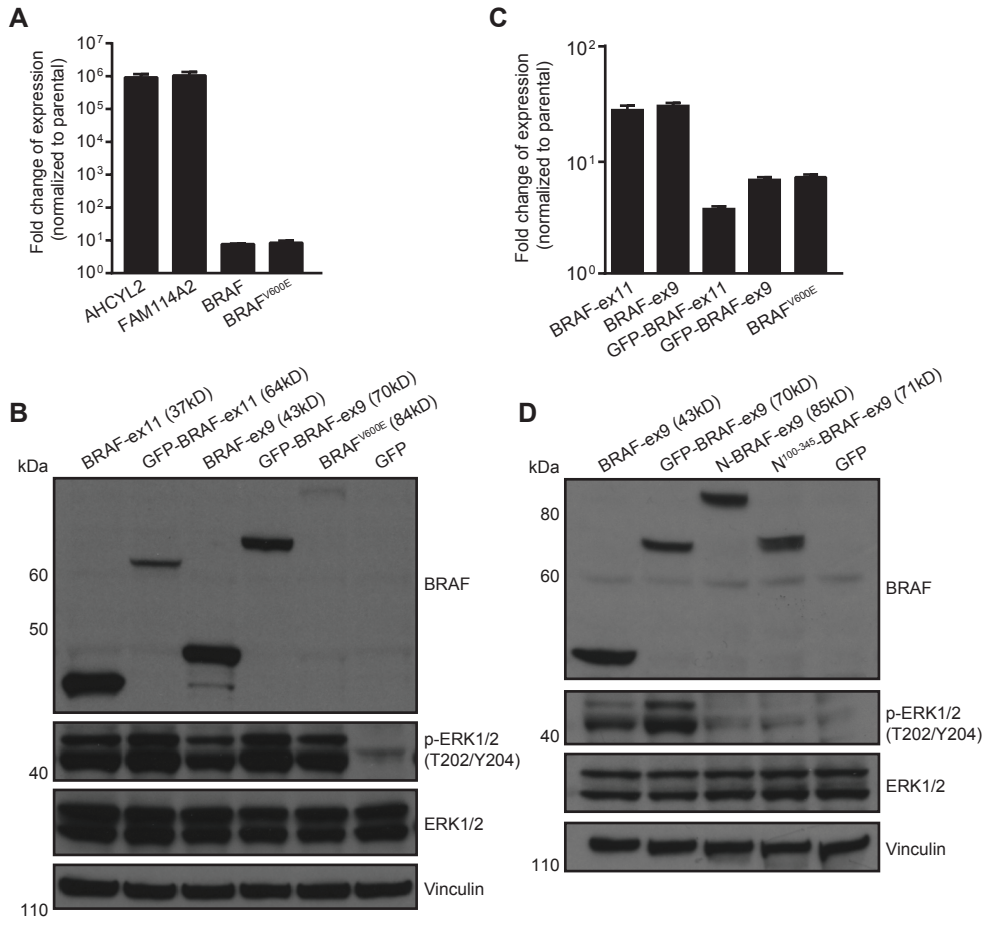

**Supplementary Figure 4.** Quantitative PCR of expression of (A) full-length wild-type genes as indicated in Ba/F3 and (C) BRAF kinase domains and GFP-BRAF fusions in Ba/F3. Immunoblots of expression of and MAPK signaling activation by (B) BRAF kinase domains and GFP-BRAF fusions and (D) BRAF fusion kinase domain (Exons 9-18) only (BRAF-ex9), fused to GFP (GFP-BRAF-ex9), fused to WT N-terminus (N-BRAF-ex9), and fused to AA100-345 fragment (N<sup>100-345</sup>-BRAF-ex9) in Ba/F3 cells.
